# Supplementary material for: A prognostic nomogram for event-free survival in patients with atrial fibrillation before cardiac resynchronization therapy
Source: Springer Nature journal article supplement (doi:10.1186/s12872-020-01502-4), 2020-05-13

# **Online resource: A nomogram-based score for prognosis in patients with atrial fibrillation before cardiac resynchronization therapy**

Minsi Cai, MD1, Wei Hua, MD, FHRS1, Nixiao Zhang, MD1, Shengwen Yang, MD1, Yiran Hu, MD1, Min Gu, MD1, Hongxia Niu, MD1, Shu Zhang, MD, FHRS1

1 State Key Laboratory of Cardiovascular Disease, Fuwai Hospital, National Center for Cardiovascular Diseases, Chinese Academy of Medical Sciences and Peking Union Medical College, Beijing, 100037, People's Republic of China

## **Corresponding author:**

Hua Wei, MD, FHRS

E-mail address: drhuaweifw@sina.com

ORCID: <http://orcid.org/0000-0003-4014-989X>

**Fig. S1** Flow chart of the study

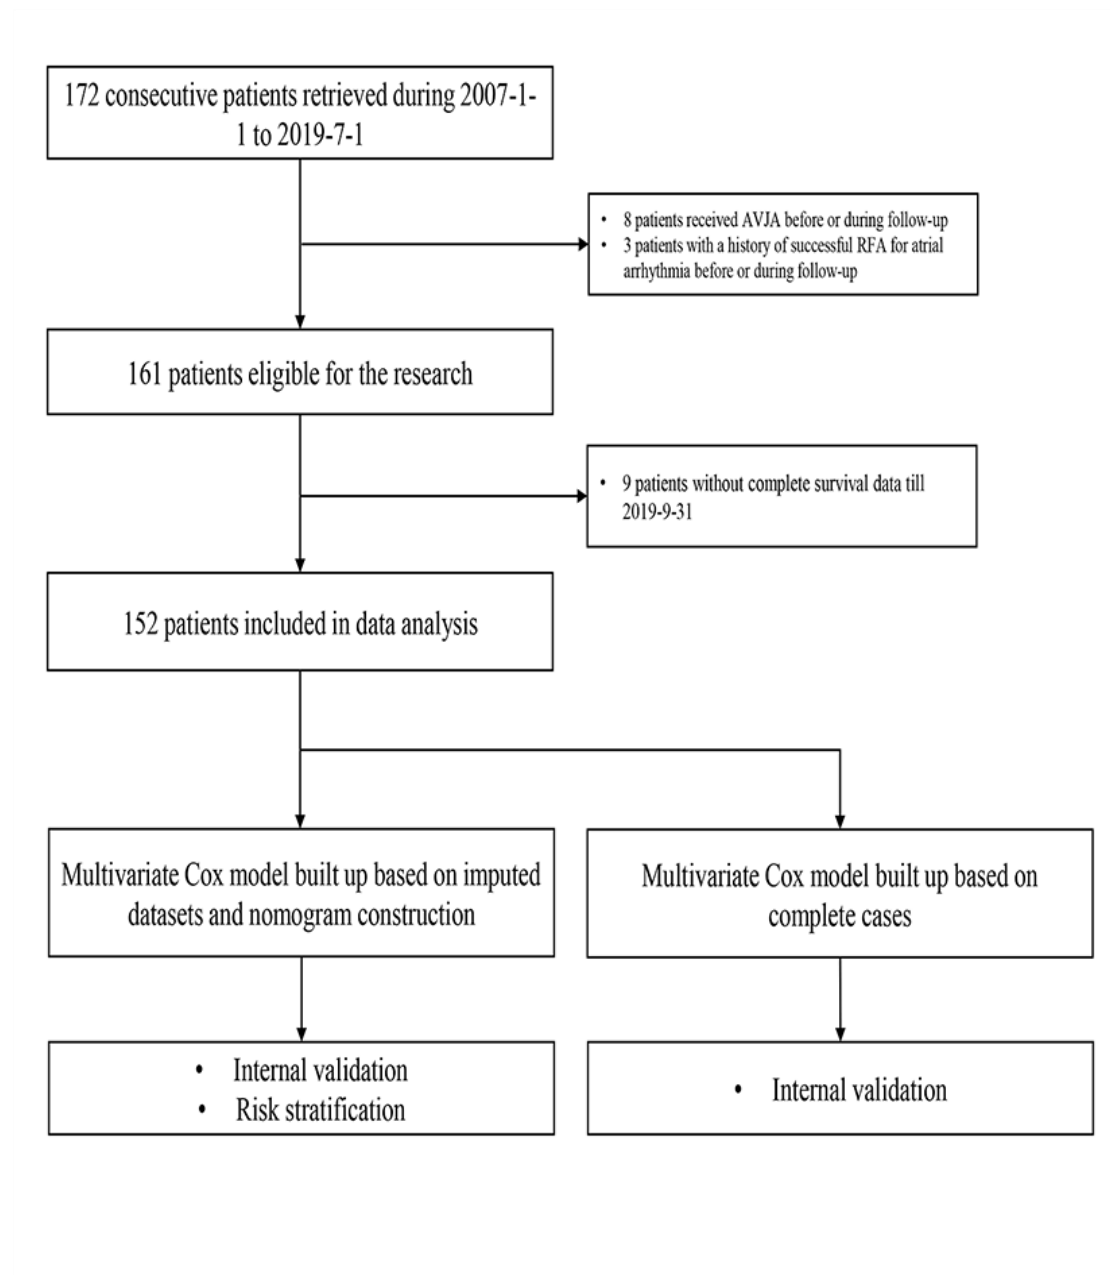

**Fig. S2** Original Kaplan-Meier event-free survival curves for different risk scores derived from the nomogram

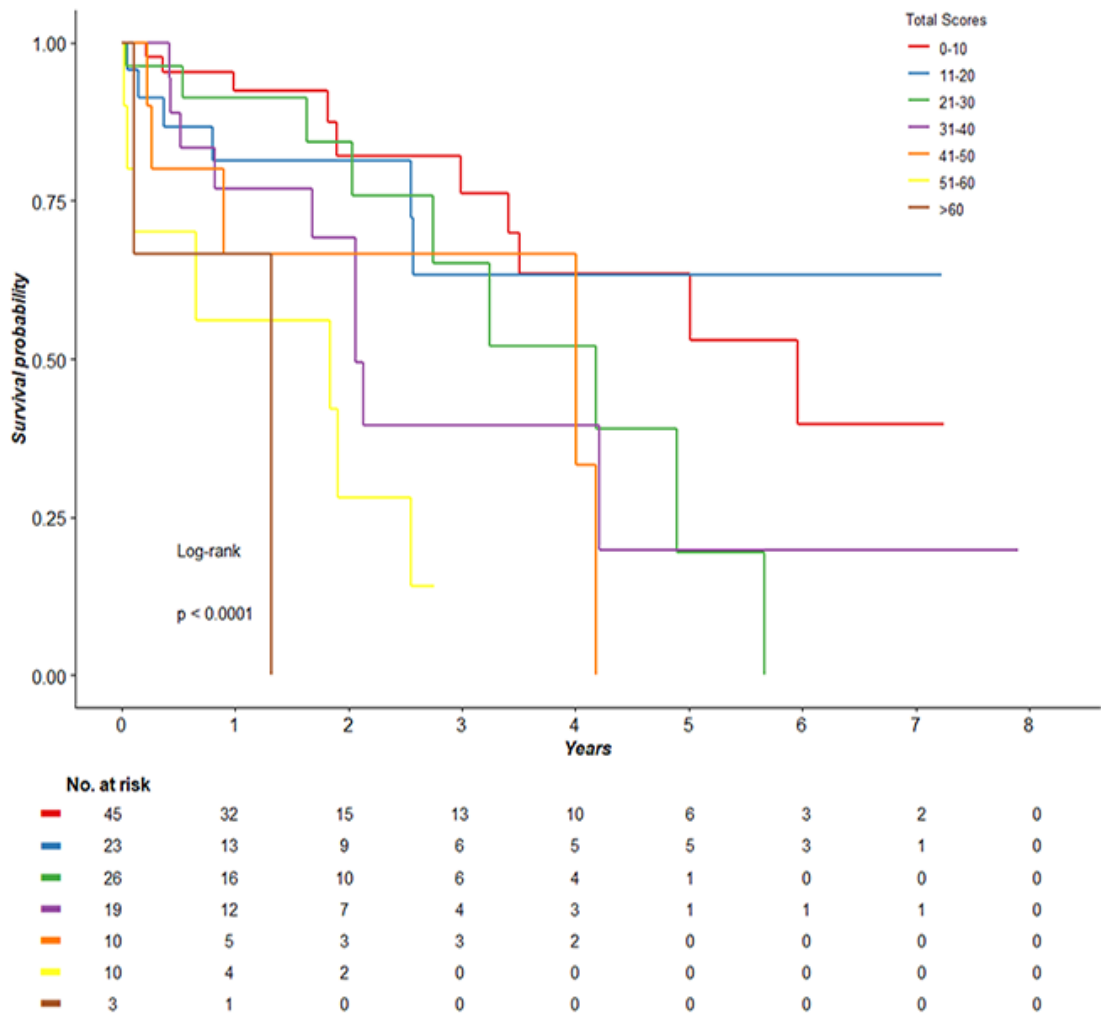

**Fig. S3** Calibration curves at different time points for the alternative model based on complete cases. Red lines stand for correlation between actual values and predictive values. Diagonal dashed lines represent the most perfect prediction. The cross signature stands for corrected predictive values versus actual values. **a:** 2-year calibration curve for the alternative model based on complete cases. **b:** 5-year calibration curve for the alternative model based on complete cases

**a**

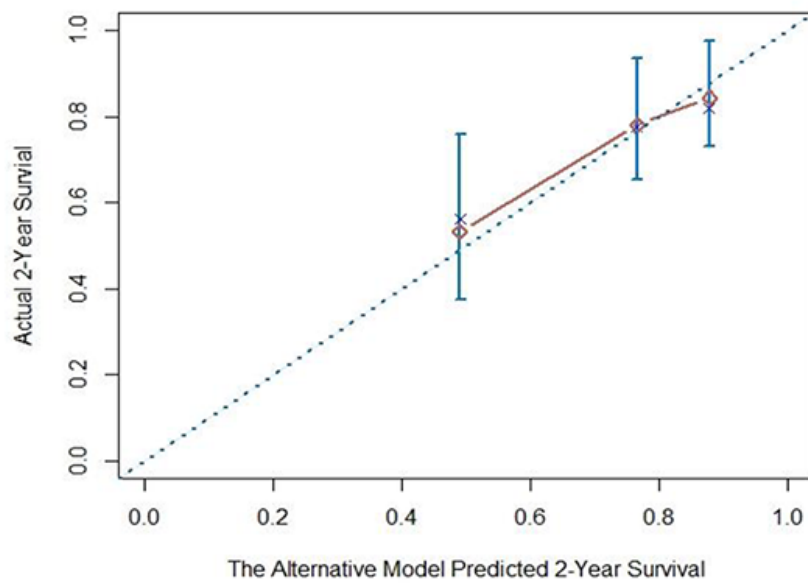

**b**

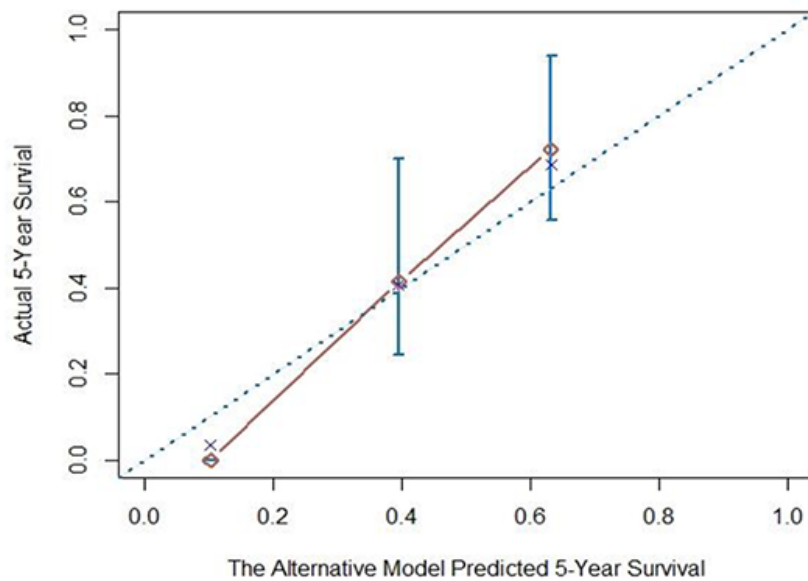

Fig. S4 Kaplan-Meier event-free survival curves stratified by TSH level in patients without amiodarone intake

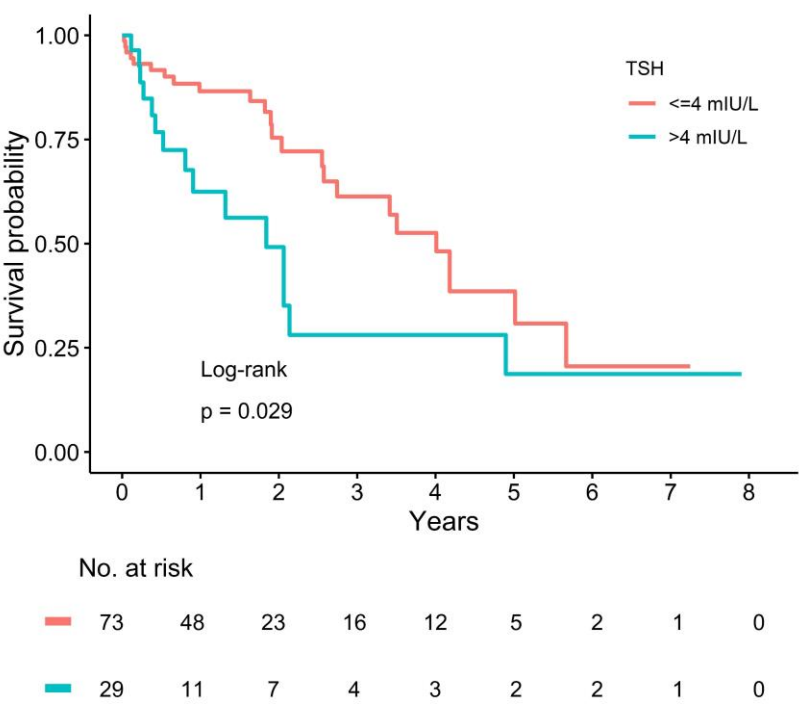

Supplement: MOESM1 [file 17979478]
